# Supplementary material
Source: publisher site journal article supplement (https://www.dovepress.com/article/275846)
Supplement: Supplementary file 1 [file get_supplementary_file.php]

**Multifunctional Nanotheranostic Gold Nanocage/Selenium Core-shell** **for PA-Guided Chemo-photothermal Synergistic Therapy *in vivo***

Xueyang Fang, Kwok-Ho Lui, Shiying Li, Wai-Sum Lo, Xin Li, Yanjuan Gu*, Wing-tak Wong*

Department of Applied Biology and Chemical Technology, The Hong Kong Polytechnic University, Hong Kong Special Administrative Region, PR China.


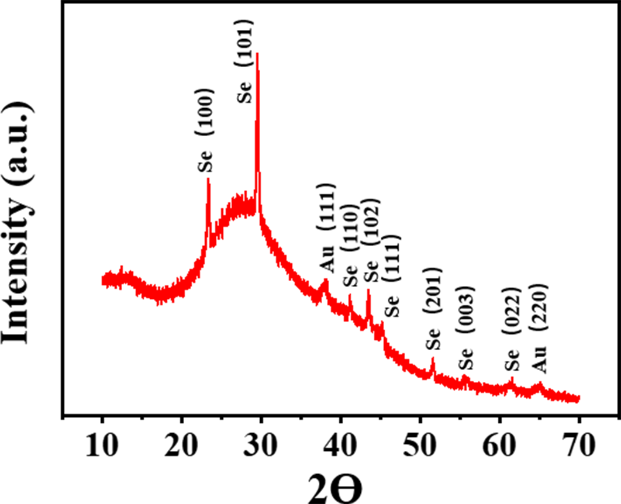


**Figure S1**. The XRD pattern of AuNCs@Se nanocomposites


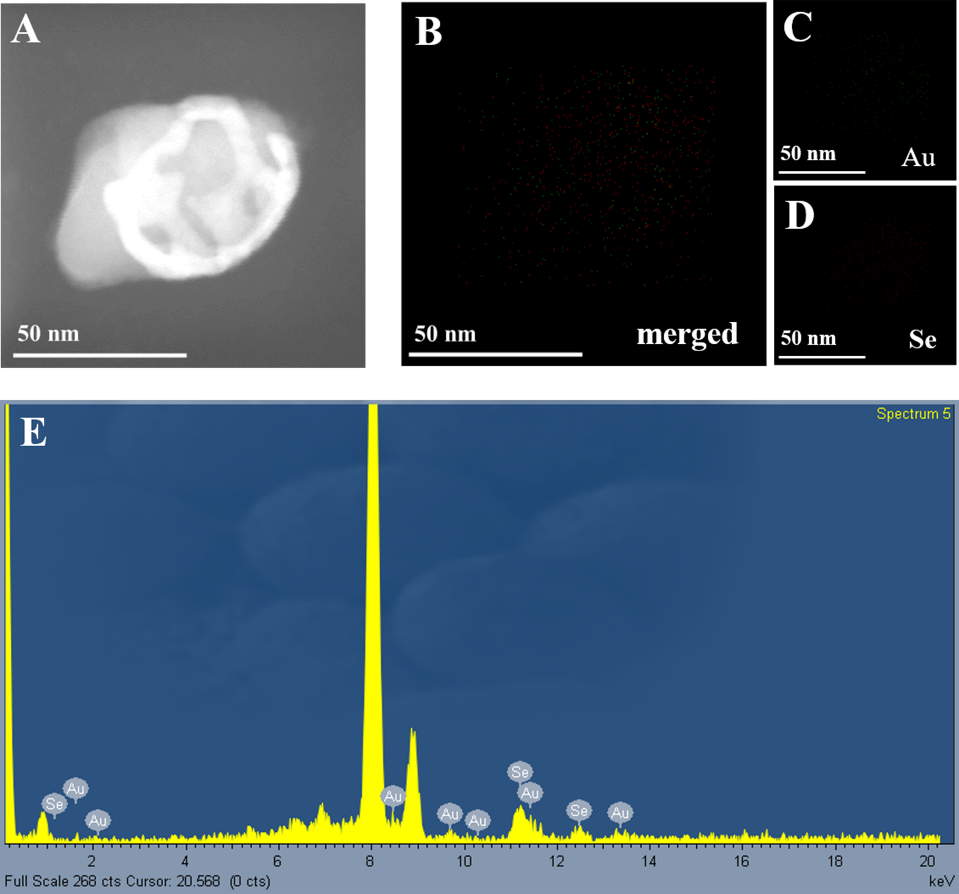


**Figure S2**. (A-D) Dark-field TEM image of AuNCs@Se and the corresponding elemental mapping images; (E) Energy dispersive spectroscopy of AuNCs@Se.


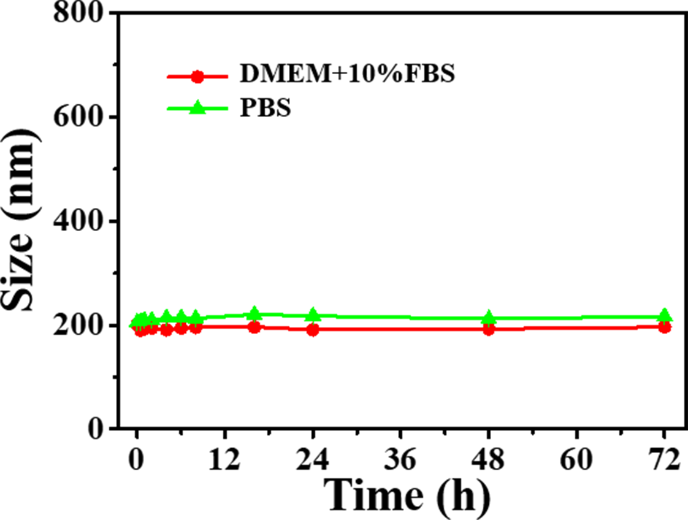


**Figure S3.** The size change of AuNCs/DOX@Se-iRGD in different media as a function of time.


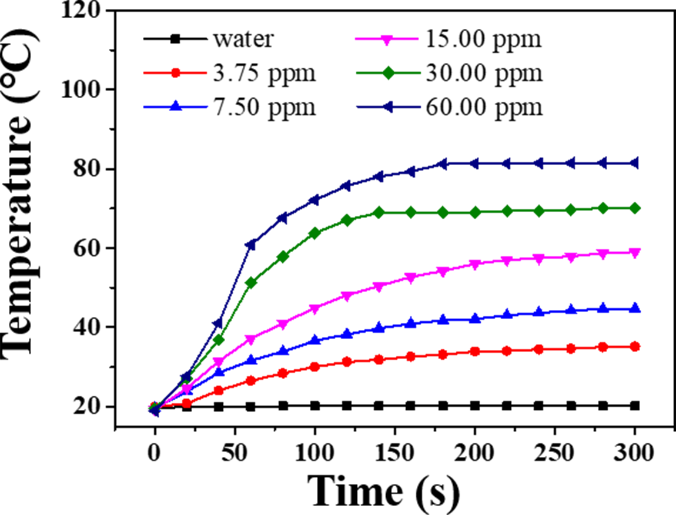


**Figure S4.** Photothermal-heating curves of AuNCs at different concentrations (0, 3.75, 7.5,15, 30, and 60 ppm) under 808 nm laser irradiation with the same power density of 1.5 W/cm2 for 300 s as function of irradiation time.


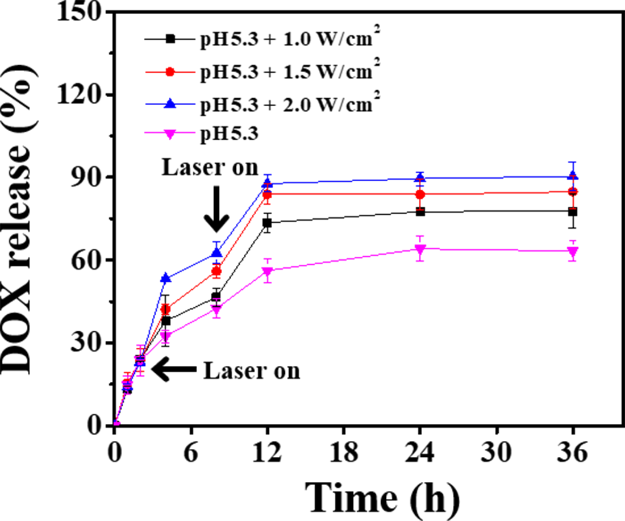


**Figure S5**. DOX release curves from AuNCs/DOX@Se-iRGD in PBS buffer at pH 5.3, with and without the NIR laser irradiation


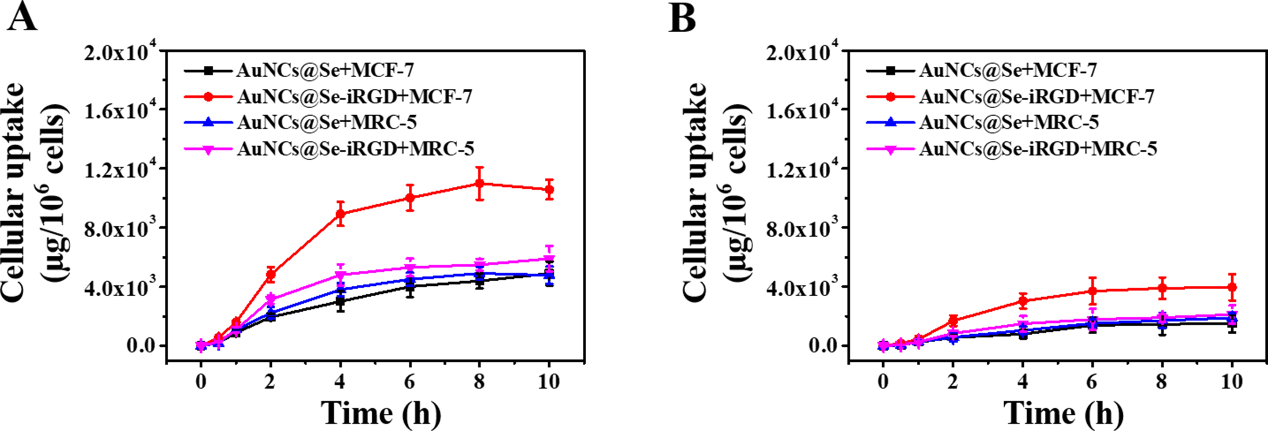


**Figure S6.** (A) Cellular uptake of AuNCs@Se and AuNCs@Se-iRGD in MRC-5 cells and MCF-7 cells at different time points, determined by Se concentration; (B) Cellular uptake of AuNCs@Se and AuNCs@Se-iRGD in MRC-5 cells and MCF-7 cells at different time points, determined by Au concentration


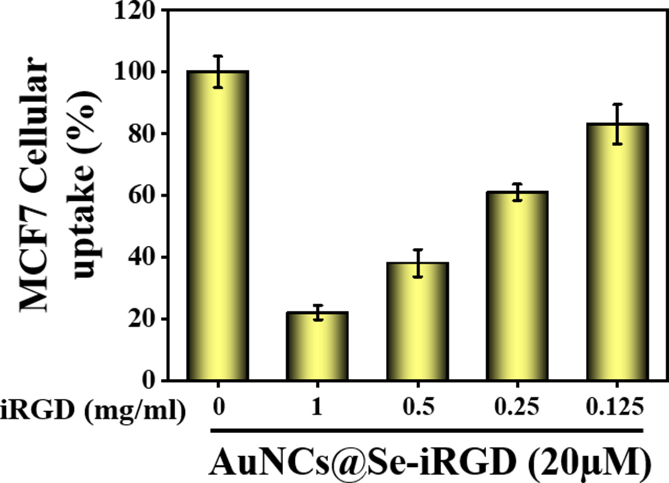


**Figure S7**. The effects of iRGD on the cellular uptake of AuNCs@Se-iRGD. The MCF-7 cells were treated with different concentrations of iRGD for 4 h, and then incubated with AuNCs@Se-iRGD for 4 h.


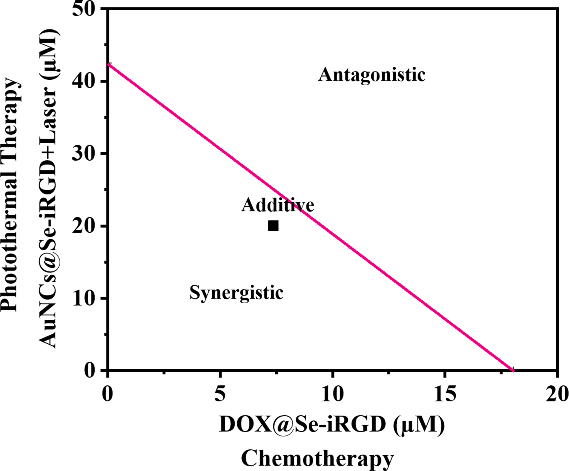


**Figure S8.** Isobologram analysis of the synergistic antiproliferative effect of the combined application of photothermal therpay and chemotherapy on MCF-7 cells. The data points in the isobologram correspond to the growth inhibition ratio at 50% in the combined treatment.
